# Supplementary material
Source: Springer Nature journal article supplement (https://www.springermedizin.de/resource/supplementary/12943_2009_643_MOESM6_ESM.pdf/9554468)

A

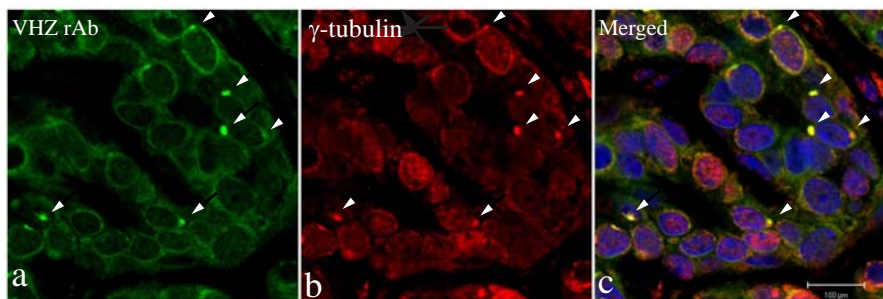

B

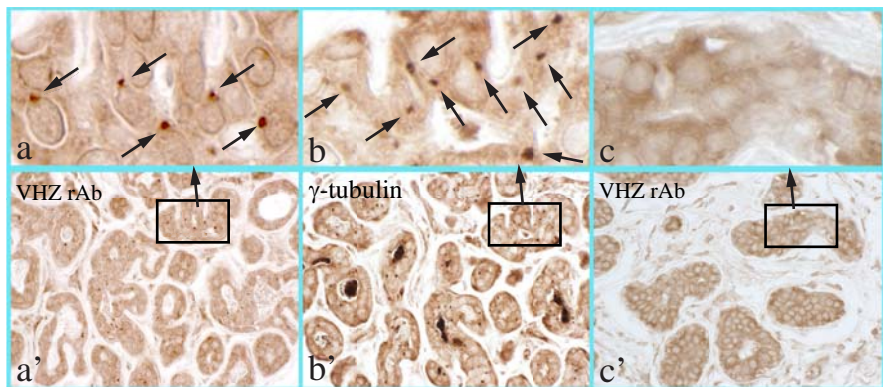

C

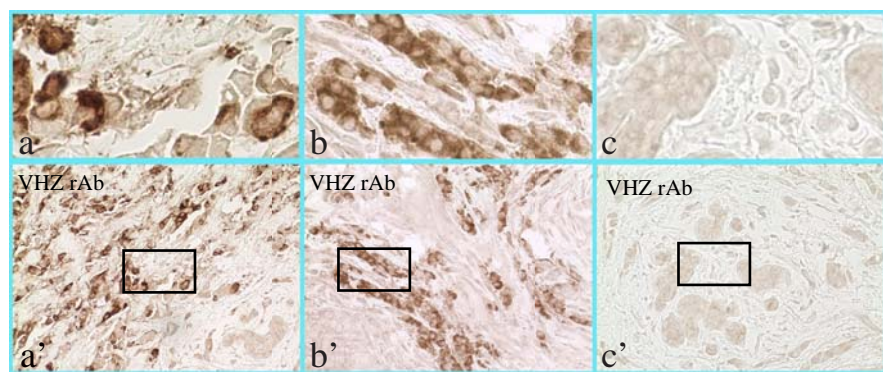

D

N T N T N T N T

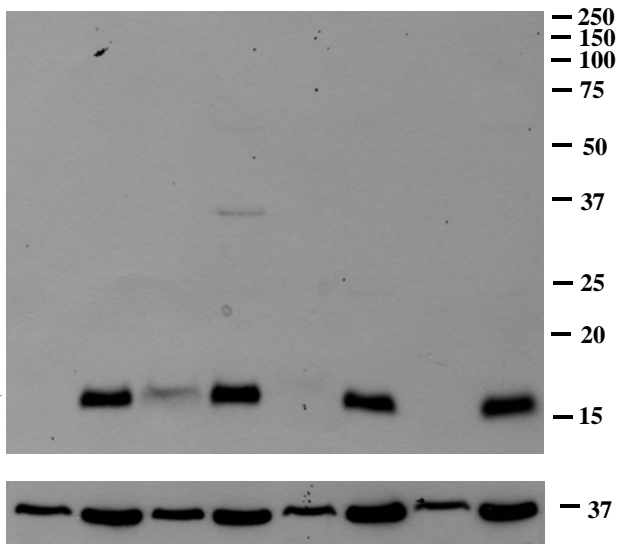

Supplement: MOESM6 [file 9554468]
